# Supplementary material
Source: publisher site journal article supplement (https://www.dovepress.com/article/332345)
Supplement: Supplementary file 1 [file get_supplementary_file.php]

**Supplementary materials**

**Supplementary Table S1**

| Antibodies and Reagents | Manufacturer, Country, Batch number | Concentration |
| --- | --- | --- |
| Roswell Park Memorial Institute 1640 (RPMI-1640) | Gibco, USA, Lot: 8121248 | - |
| Fetal bovine serum (FBS) | Gibco, USA, Lot: 42F1376K | - |
| Dulbecco’s modified Eagle’s medium (DMEM) | Gibco, USA, Lot: 8121032 | - |
| Lentiviral vectors of LHFPL6 | GeneChem, China, Lot: 142363D | - |
| Polybrene | GeneChem, China. Lot: 139146B | 2 μg/mL |
| Puromycin | Beyotime Biotechnology, China. Lot:041321210517 | 1.5 μg/mL |
| LHFP Polyclonal Antibody (IHC) | Invitrogen, USA. Lot: SJ2449155 | 1:500 |
| Lipoma HMGIC Fusion Partner (LHFP) Antibody (WB) | Abbexa, UK. Lot: 029944 | 1:1000 |
| β-actin Antibody | Invitrogen, USA. Lot: RI2265993 | 1:5000 |
| E-cadherin Antibody | Cell Signaling Technology, USA. Lot:6 | 1:1000 |
| N-cadherin Antibody | Cell Signaling Technology, USA. Lot:12 | 1:1000 |
| MMP2 Antibody | Cell Signaling Technology, USA. Lot:3 | 1:1000 |
| MMP9 Antibody | Cell Signaling Technology, USA. Lot:5 | 1:1000 |
| Vimentin Antibody | Proteintech, China, Lot: 00017056, | 1:1000 |
| TGF-β1 | Proteintech, China, Lot: 00021336 | 1:1000 |
| Human Lipoma HMGIC fusion partner (LHFPL6) ELISA Kit | Abbexa, UK. Lot: 530952 | - |
| phorbol 12-myristate 13-acetate (PMA) | Sigma-Aldrich, USA. Lot: SLBX8899 | 10 ng/mL |
| anti-CD163 polyclonal antibodies | Proteintech, China. Lot: 00091171 | 1:1000 |
| anti-CD206 polyclonal antibodies | Proteintech, China. Lot: 00089604 | 1:1000 |
| Alexa Fluor 488 AffiniPure goat anti-mouse IgG (H+L) | FcMACS, China. Lot: 136908 | 1:2000 |
| Goat anti-mouse IgG (H+L) CoraLite594 | Proteintech, China. Lot: 20000154 | 1:1000 |
| Goat anti-rabbit IgG (H+L) R-PE conjugate | Proteintech, China. Lot: 20000129 | 1:1000 |


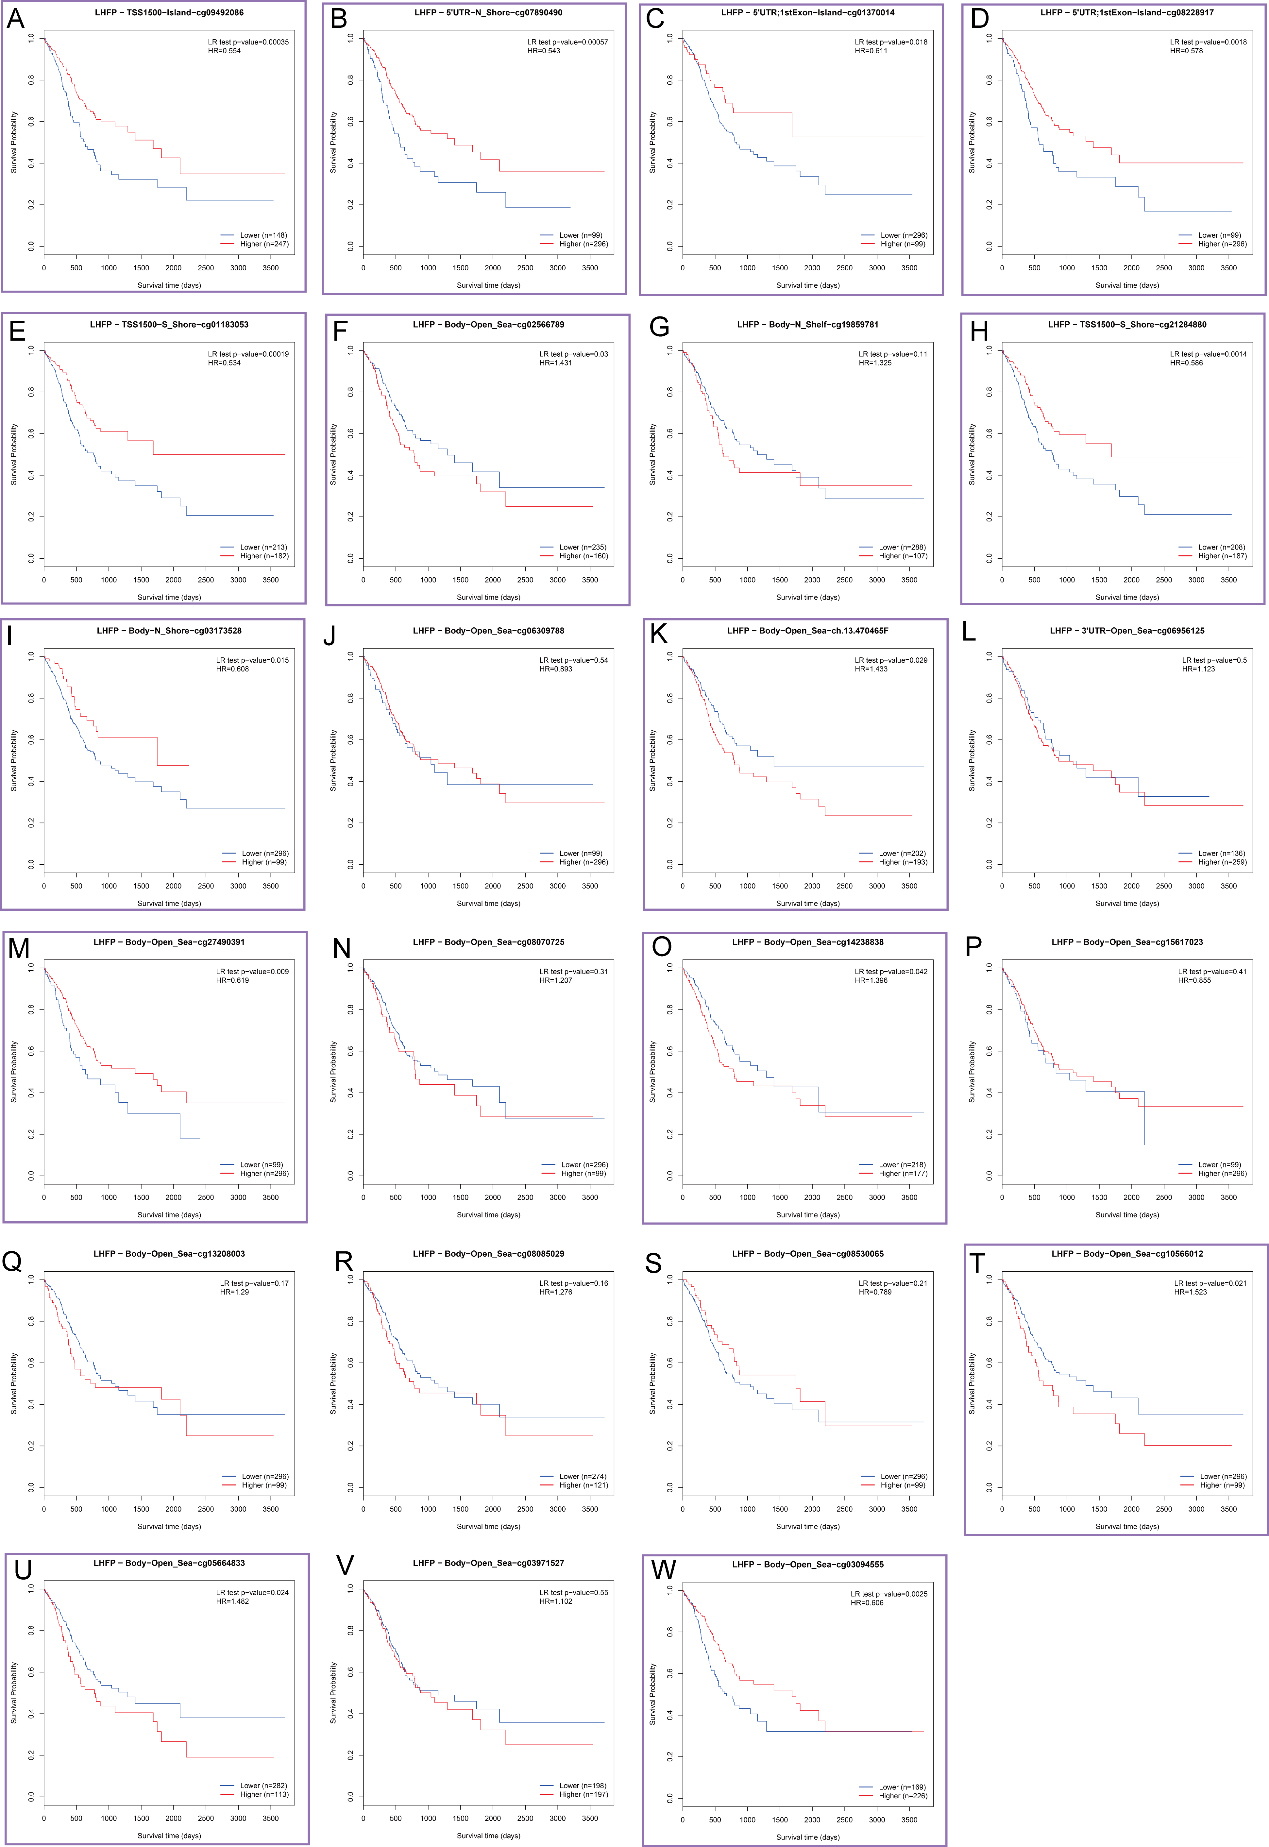


**Figure S1.** (A-W) Survival analysis for all methylation probes; P < 0.05 was considered statistically significant.

***Immunohistochemical staining***

GC tissue and the surrounding non-tumorous tissue (margin, 5 cm) were collected during surgery from 10 previously treatment-naïve patients with GC at the Jiangsu Provincial Hospital of Traditional Chinese Medicine. After extraction, tissue specimens were washed with cold phosphate-buffered saline and immediately placed in liquid nitrogen. They were then transferred and stored at -80°C until further examination using immunohistochemistry (IHC) and western blot analysis.

After blocking tissue sections with protein blocking solution, slides were incubated with LHFP Polyclonal Antibody. IHC results (intensity and extent of staining) were independently scored by two observers. Staining intensity was graded as follows: 0, negative staining; 1, weak staining; 2, moderate staining; and 3, strong staining. The extent of staining was scored based on the proportion of positively stained cells per specimen, as follows: 0, no positively stained cells; 1 <10% positively stained cells; 2, 10–50% positively stained cells; and 3, >50% positively stained cells. The histochemistry score (H-SCORE), which represents the proportion of positively stained cells and the intensity of expression, was calculated as follows: H-SCORE= ∑(PI × I) = (percentage of cells with weak intensity × 1) + (percentage of cells with moderate intensity × 2) + (percentage of cells with strong intensity × 3). In the formula, PI represents the percentage of positive cells to the total number of cells in a particular field and I represent the intensity of staining. The H-SCORE ranges from 0 to 300, with a higher score representing stronger positive staining.

***Construction of LHFPL6 lentiviral vectors***

Easy-siRNA design:

| **NO.** | **Accession** | **Target Seq** | **CDS** | **GC%** |
| --- | --- | --- | --- | --- |
| LHFPL6-RNAi (103246) | NM_005780 | gaAACAGAAGCACTACCCATA | 486..1088 | 42.11% |
| Description | Homo sapiens LHFPL tetraspan subfamily member 6 (LHFPL6), mRNA | | |  |

lentivirus vector name：GV493

The sequence elements are in the following order: hU6-MCS-CBh-gcGFP-IRES-puromycin.

Negative Control insert sequence: TTCTCCGAACGTGTCACGT

The lentivirus vector brochure can be downloaded via the following website: http://www.genechem.com.cn/service/index.php?ac=gene&at=vector_search&keyword=GV493


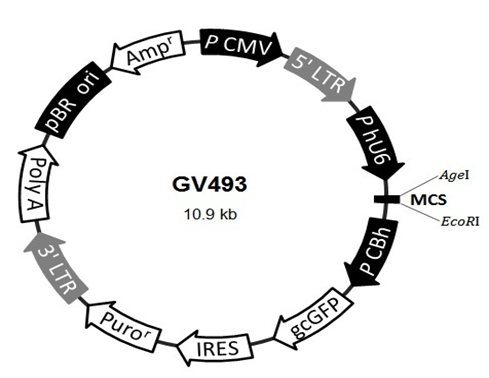


The map of shRNA lentiviral vector

lentivirus overexpression vector name：GV492

The sequence elements are in the following order: Ubi-MCS-3FLAG-CBh-gcGFP-IRES-puromycin.

The cloning site is BamHI / AgeI

**
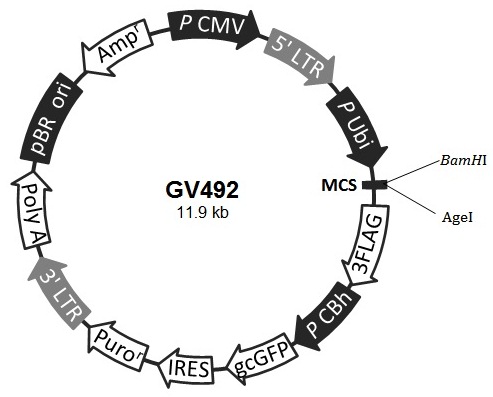
**

The map of lentivirus overexpression vector

The lentivirus vector brochure can be downloaded via the following website: http://www.genechem.com.cn/index/supports/tool_search.html?keywords=GV492

For overexpression lentiviruses, the complete nucleotide sequences of LHFPL6 were constructed [5’-3’].

[ATGGCATCCAGCCTGACTTGTACTGGAGTAATCTGGGCTTTGCTGTCTTTTCTTTGTGCTGCCACCTCCTGCGTGGGGTTCTTTATGCCTTACTGGCTCTGGGGATCACAGCTGGGCAAGCCTGTGTCCTTCGGTACCTTCCGGAGGTGCTCATATCCTGTGCATGATGAGAGTCGGCAGATGATGGTGATGGTGGAGGAATGTGGGCGCTATGCCTCCTTCCAGGGCATCCCCAGCGCAGAATGGAGGATCTGCACCATAGTGACCGGCCTGGGTTGTGGCCTCCTCCTCCTGGTGGCGCTCACTGCCCTCATGGGTTGCTGTGTTTCCGACCTCATCTCCAGGACAGTGGGAAGAGTGGCTGGAGGAATTCAGTTTCTTGGGGGCTTGTTGATTGGTGCTGGCTGTGCCCTCTACCCCTTGGGCTGGGACAGTGAGGAAGTCCGGCAGACTTGTGGCTACACTTCTGGCCAGTTTGACCTGGGGAAGTGTGAAATCGGCTGGGCCTACTACTGCACGGGAGCAGGTGCCACTGCCGCCATGCTGCTGTGCACGTGGCTGGCTTGCTTTTCGGGCAAGAAACAGAAGCACTACCCATAC]

***Western blot assessment***

Proteins were extracted using a Radio Immunoprecipitation Assay (RIPA) buffer and quantitatively detected using the Bradford method. Samples containing the same amount of 20 µg proteins were separated by 10% Sodium dodecyl sulfate polyacrylamide gel electrophoresis (SDS-PAGE). Then, the proteins were moved onto polyvinylidene fluoride (PVDF) membranes. After blocking with 5% bovine serum albumin (BSA), the membranes were incubated with specific primary antibodies at 4˚C overnight. The following day, the membranes were rinsed thrice with Tris-buffered saline containing 0.05% Tween-20 (TBST) and incubated with the corresponding secondary antibodies. Finally, an Electrochemiluminescence (ECL) detection kit was employed to assess the densities. β-actin was used as reference.

***Enzyme linked immunosorbent assay (ELISA)***

We used the LHFPL6 ELISA kit to detect its protein content in the cell supernatant. Supernatant from the culture was collected into sterile tubes. After centrifugation for 20 minutes at 2000 rpm, the supernatant was carefully collected. ELISA was performed according to the manufacturer's instructions and the optical density of each well was examined immediately using a microplate reader (Bio-tek synergy HT) at 450 nm.

***Colony Formation Assay***

HGC27 cells after transfection were seeded onto 12-well plates. After 14 days of incubation, the cells were fixed with 4% paraformaldehyde for 15 mins and stained with 0.1% crystal violet for 30mins. The clones were photographed with a microscope. The number of visible clones indicated the ability of cell clone formation. The number of colonies was counted using a compound light microscope (Olympus BX53, Japan).

***Migration and invasion assays.***

To investigate cell migration *in vitro*, GC cells with NC, sh-LHFPL6, and oe‐LHFPL6 constructs were collected. Approximately 1 × 104 cells in 200 μL of serum-free culture media were incubated in the upper chamber, while 300 μL of the media supplemented with 10% bovine serum were placed in the lower chamber. After 24 h of incubation, the cells that could not attach to the top chamber were scraped off, while cells that adhered to the lower chamber were fixed with 95% alcohol and then stained with 0.05% crystal violet. Then, images of five random fields of the stained filters were captured under a microscope (×200). Invasion assays were performed under the same conditions as the Transwell migration assays, although the cells were placed in 8-μm pore size Matrigel-coated invasion chamber inserts. Then, the cells that had traversed through the membrane and entered the lower chamber were counted, and images were taken with a light microscope at a magnification of 200×. The results represent the average of three independent experiments.

***Immunofluorescence staining***

Briefly, cells seeded on coverslips were fixed with ice-cold methanol for 10 min followed by permeabilization with 0.1% Triton X-100 for 10 min at room temperature. The cells were then blocked with 10% bovine serum albumin in phosphate-buffered saline, 0.1% Tween followed by an overnight incubation (4 °C) with the primary antibody. This procedure was followed by an incubation with the secondary antibodies. Nuclei were stained using 4',6-diamidino-2-phenylindole (DAPI) for 3 min, and the cells were incubated in the dark for 3 min. The slides were washed with phosphate buffered saline (PBS) four times, for 5 min each. Then, the slides were sealed with sealing solution containing a fluorescence quencher and observed and imaged under a fluorescence microscope.

**① Concentration screening of Polybrene**

**Polybrene** is a positively charged small molecule that binds to anions on the cell surface and improves the efficiency of lentiviral transfection in cells. The addition of polybrene can improve transfection efficiency 2- to 10-fold. Because different cells have different sensitivities to polybrene, we used a range of 1–10 μg/ml for screening at the beginning of the experiment, and finally settled on a working concentration of **2** μg/ml.

②**Puromycin screening of stable shRNA-transfected cell lines**

(1) The cell density in 24-well plates was 5 x 104 cells/well.

(2) Prepare screening medium, i.e., fresh medium containing different concentrations of puromycin (0–10 μg/mL).

(3) Incubate cells overnight in screening medium.

(4) Replace old screening medium with fresh screening medium every ~2–3 days.

(5) Observe surviving cells daily, as the optimal duration of puromycin action generally ranges from 1 to 4 days.

(6) The minimum concentration of puromycin used is the lowest concentration that kills all cells within 1–4 days from the start of screening.

(7) The concentration we chose after screening was 1.5 μg/mL.

**③ Phorbol-12-myristate 13-acetate (PMA) induction scheme selection**

The THP-1 cell line is a human leukemia cell-derived monocyte line that is capable of acquiring phenotypic and functional characteristics similar to those of primary macrophages upon PMA stimulation. It is currently the most widely used in vitro model of human-derived macrophages. It has been proven that 5 ng/mL PMA treatment can cause THP-1 monocytes to differentiate into macrophages. In addition, many researchers believe that the higher the PMA concentration, the easier it is for differentiated macrophages to transform into the M1 subtype. Therefore, a low-concentration induction protocol was chosen for this study. Due to various inter-laboratory variations, initial induction with 5 ng/mL PMA for 48 h resulted in only about 60% of the THP-1 cells adhering to the wall. Subsequently, after many adjustments, 10 ng/mL for 48 h was selected as the induction model, as 95% of THP-1 cells differentiated and adhered to the wall under this treatment condition.
